# Supplementary material for: Inter- and intrafraction dose variations in robotic stereotactic body radiation therapy (SBRT) for perihilar cholangiocarcinoma in the prospective phase I STRONG trial
Source: Front Oncol. 2023 Mar 8;13:1114737. doi: 10.3389/fonc.2023.1114737 (PMC10032458; doi:10.3389/fonc.2023.1114737)
Supplement: Supplementary file 1 [file Table_1.xlsx]

## Sheet: patient 1
Supplementary Table S1
Patient 1
	constraint	treatmentplan	pre-1	post-1	pre-2	post-2	pre-3	post-3	pre-4	post-4	pre-5	post-5	pre-6	post-6
STOMACH
V41Gy (cc)	≤ 5 cc	3.78	2.33	5.89	x	x	2.77	1.69	7.7	6.86	7.4	2.91	4.91	4.03
D5cc (Gy)	≤ 41 Gy	40.22	38.42	41.6	x	x	38.23	34.48	43.03	42.35	42.89	39.19	40.93	40.27
Dmax (Gy)	< 57 Gy	46.93	46.55	52.4	x	x	46.58	48.33	57.03	58.33	52.72	47.54	52.47	52.07
DUODENUM
V41Gy (cc)	≤ 5 cc	2.15	2	0.98	x	x	1.43	1.28	0.59	0.2	0.42	0.38	3.18	4.09
D5cc (Gy)	≤ 41 Gy	17.17	18.56	14.03	x	x	15.64	14.77	12.09	10.01	9.66	8.56	27.24	37.61
Dmax (Gy)	<57 Gy	55.61	55.44	53.8	x	x	54.6	54.04	52.6	50.28	53.43	51.35	54.5	58.93
BOWEL
V41Gy (cc)	≤ 5 cc	0	0	0	x	x	0	0	0	0	0	0	0	0
D5cc (Gy)	≤ 41 Gy	21.7	19.57	22.01	x	x	19.96	19.02	22.29	22.61	18.25	16.6	22.59	19.64
Dmax (Gy)	<57 Gy	29	28.31	29.54	x	x	24.66	23.66	25.42	28.29	24.86	25.44	26.21	24.55
ESOPHAGUS
Dmax (Gy)	≤ 50.25 Gy	9.33	8.96	9.47	x	x	9.65	9.78	7.97	8.28	9.8	10.2	9.83	9.79
HEART
Dmax (Gy)	<57 Gy	20.85	22.3	21.62	x	x	20.97	20.87	20.55	20.25	21.14	21.02	20.96	21.35
GALLBLADDER
Dmax (Gy)	≤ 63 Gy	63.59	64.43	65.21	x	x	67.87	66.43	64.41	64.56	65.03	65.34	64.73	66.01
SPINAL CORD
Dmax (Gy)	≤ 33.8	7.88	7.94	7.95	x	x	7.49	7.74	7.53	7.66	7.82	7.92	7.82	7.88
KIDNEY RIGHT
D67.7% right kidney (Gy)	< 25.5 Gy	1.01	1.05	0.96	x	x	0.98	0.97	0.84	0.85	0.89	0.58	1.03	1.02
V25.5 Gy (%)	< 67.7 % right kidney	0	0	0	x	x	0	0	0	0	0	0	0	0
KIDNEY LEFT
D67.7% left kidney (Gy)	< 25.5 Gy	2.01	2.04	2.02	x	x	1.82	1.69	2.34	2.07	2.29	1.8	2.02	1.75
V25.5 Gy (%)	< 67.7 % left kidney	0	0	0	x	x	0	0	0	0	0	0	0	0
CENTRAL BILIARY TRACT
D0.5cc (Gy)	< 70 Gy	69.1	69.01	69.09	x	x	71.21	70.58	69.73	69.7	71.13	70.32	70.92	70.75
V70 Gy (cc)	< 0.5 cc	0	0	0	x	x	4.52	2.46	0.14	0.06	3.79	1.73	3.09	3.2
LIVER-GTV
dose in ≥ 700 mL healty liver (Gy)	<25.5 Gy	9.95	10.59	11.3	x	x	8.84	8.92	9.42	8.79	11.43	11.25	10.18	9.84
GTV
V45Gy (%)	--	97.44	97.64	98.37	x	x	98.55	97.85	98.23	97.51	97.61	95.23	98.74	98.05
V60Gy (%)	--	86.98	86.56	88.13	x	x	85.9	84.81	87.83	86.13	85.67	78.85	88.38	84.98
D2% (Gy)	--	73.37	73.33	73.66	x	x	75.49	74.7	74.42	64.74	75.45	74.63	75.89	75.48
D50% (Gy)	--	68.7	68.78	69	x	x	70.66	69.98	69.46	69.34	70.69	69.67	70.62	70.27
D98% (Gy)	--	44.14	44.45	45.64	x	x	45.69	44.76	45.4	44.35	44.39	42.8	46.19	45.06
PTV
V45Gy (%)	--	94.26	94.26	95.29	x	x	94.42	93.43	95.32	94.43	94.53	90.12	95.4	93.01
V60Gy (%)	--	80.07	78.23	81.1	x	x	77.44	75.75	78.94	78.37	79.27	73.33	80.92	75.56
D2% (Gy)	--	73.3	73.93	73.86	x	x	76.04	75.55	74.23	74.09	75.73	75.87	75.98	76.37
D50% (Gy)	--	67.86	68.17	68.36	x	x	70.02	69.22	68.48	68.44	69.85	69.04	69.94	69.67
D98% (Gy)	--	41.02	41.02	42.09	x	x	41.41	40.55	41.9	41.26	40.99	36.42	42.19	40.05
STOMACH VOLUME (cc)		247.65	245.68	218.07	x	x	252.28	284.29	246.88	259.34	302.08	300.08	222.97	265.39
GALLBLADDER VOLUME (cc)		8.19	8.14	8.59	x	x	8.38	8.81	8.09	8.24	8.46	8.21	5.37	5.83

## Sheet: patient 2
Patient 2
	constraint	treatment plan	pre-1	post-1	pre-2	post-2	pre-3	post-3	pre-4	post-4	pre-5	post-5	pre-6	post-6
STOMACH
V41Gy (cc)	≤ 5 cc	3.09	3.9	4.2	6.69	4.88	9.13	4.77	9.79	6.61	11.87	10.68	11	9.36
D5cc (Gy)	≤ 41 Gy	39.94	40.37	40.58	41.94	40.94	43.07	40.88	43.5	41.9	44.47	44.26	44.34	43.27
Dmax (Gy)	< 57 Gy	45.93	49.34	49.65	54.69	50.22	60.4	55.34	64.75	57.68	67.79	64.48	62.48	59.5
DUODENUM
V41Gy (cc)	≤ 5 cc	3.71	4.53	7.6	11.23	9.01	14.51	11.6	12.98	11.05	12.63	7.74	10.01	4.78
D5cc (Gy)	≤ 41 Gy	40.39	40.64	42.63	46.57	44.11	52.23	48.62	51.98	47.08	50.32	43.03	47.5	40.81
Dmax (Gy)	<57 Gy	47.02	59.65	65.09	67.35	66.56	66.4	66.49	68.57	66.72	67.79	62.78	65.24	52.14
BOWEL
V41Gy (cc)	≤ 5 cc	0	0	0	0	0	0	0	0	0	0	0	0	0
D5cc (Gy)	≤ 41 Gy	12.27	19.2	24.05	19.6	20.75	17.8	18.68	15.88	15.34	18.44	20.81	13.24	13.52
Dmax (Gy)	<57 Gy	25.77	29.58	38.31	28.81	32.71	26.48	27.31	24.89	24.75	27.51	32.08	19.17	18.73
ESOPHAGUS
Dmax (Gy)	≤ 50.25 Gy	13.99	19.61	12	13.63	14.35	12.5	12.27	12.27	15.12	11.53	14.61	11.43	12.07
HEART
Dmax (Gy)	<57 Gy	20.18	19.83	19.29	19.61	20.83	18.92	19.81	18.44	19.09	17.52	18.92	18.03	18.17
GALLBLADDER
Dmax (Gy)	≤ 63 Gy	x	x	x	x	x	x	x	x	x	x	x	x	x
SPINAL CORD
Dmax (Gy)	≤ 33.8	13.94	14.74	12.61	12.76	12.83	13.38	12.82	12.9	12.36	13.51	12.97	13.1	12.97
KIDNEY RIGHT
D67.7% right kidney (Gy)	< 25.5 Gy	7.39	8.34	6.6	7.8	7.15	8.11	7.5	8.38	7.84	8.18	7.87	8.42	8.13
V25.5 Gy (%)	< 67.7 % right kidney	0.54	0.3	0	0.29	0	1.02	0.28	1.2	0.47	0.7	0.6	1.49	0.89
KIDNEY LEFT
D67.7% left kidney (Gy)	< 25.5 Gy	6.66	7.02	6.56	6.14	6.6	5.88	6.07	6.05	6.39	5.92	6.44	5.98	6.32
V25.5 Gy (%)	< 67.7 % left kidney	0	0	0	0	0	0	0		0	0	0	0	0
CENTRAL BILIARY TRACT
D0.5cc (Gy)	< 70 Gy	68.59	68.65	69.74	70.04	69.58	69.6	69.59	69.27	69.02	69.38	69.03	69.2	69.28
V70 Gy (cc)	< 0.5 cc	0	0	0.12	0.61	0	0	0	0	0	0	0		0
LIVER-GTV
dose in ≥ 700 mL healty liver (Gy)	<25.5 Gy	10.42	19.32	10.08	10.13	10.51	10.5	11.12	9.97	10.49	9.99	10.45	9.16	9.6
GTV
V45Gy (%)	--	99.34	100	100	99.99	100	100	100	99.99	99.87	100	99.93	99.98	100
V60Gy (%)	--	90.95	96	96.83	93.23	93.44	96.32	94.83	94.74	93.03	95.64	94.15	94.33	94.54
D2% (Gy)	--	72.71	72.66	73.63	73.8	73.36	73.67	73.57	73.4	73.11	73.52	73.1	73.2	73.29
D50% (Gy)	--	67.3	67.42	68.63	68.77	68.5	68.37	68.41	68.04	67.95	68.1	67.86	67.89	68.1
D98% (Gy)	--	49.2	56.67	57.51	52.97	51.78	56.63	54.85	54.26	51.92	55.65	53.27	53.65	53.53
PTV
V45Gy (%)	--	93.94	97.01	97.4	96.05	95.86	97.23	96.61	96.56	95.56	97.11	96.33	96.29	96.36
V60Gy (%)	--	80.94	81.45	81.77	82.42	83.33	82.86	82.72	82.56	82.95	82.22	82.57	81.84	82.82
D2% (Gy)	--	71.37	71.37	72.3	72.47	72.08	72.35	72.26	72.08	71.79	72.21	71.79	71.89	71.99
D50% (Gy)	--	64.74	65.06	65.93	66.29	66	65.93	65.97	65.64	65.56	65.69	65.52	65.57	65.73
D98% (Gy)	--	40.15	43.04	43.99	42.38	42.01	43.73	42.87	42.81	41.81	43.53	42.31	42.31	42.32
STOMACH VOLUME (cc)		278.38	141.22	157.39	256.78	216.67	268.82	238.63	334.6	298.94	300.46	247.79	343.92	304.97
GALLBLADDER VOLUME (cc)		x	x	x	x	x	x	x	x	x	x	x	x	x

## Sheet: patient 3
Patient 3
	constraint	treatment plan (plan 2 from fraction 3)	pre-1	post-1	pre-2	post-2	pre-3	post-3	pre-4	post-4	pre-5	post-5	pre-6	post-6
STOMACH
V41Gy (cc)	≤ 5 cc	0 (plan 1)/ 0 (plan 2)	0	0	0	0	0	0	0	0	0	0	0	0
D5cc (Gy)	≤ 41 Gy	19.97 (plan 1 )/20.83 (plan 2)	20.07	19.19	20.38	19.76	17.77	18.58	21.15	20.69	20.93	18.58	18.17	17.43
Dmax (Gy)	< 57 Gy	26.12 (plan 1)/ 29.92 (plan 2)	28.81	24.93	29.38	27.2	27.36	25.09	28.45	28.15	27.22	26.55	26.4	22.1
DUODENUM
V41Gy (cc)	≤ 5 cc	4.26 (plan 1)/ 2.95 (plan 2)	3.13	1.1	3.12	1.83	1.36	2.52	3.45	2.09	3.03	3.81	4.36	4.41
D5cc (Gy)	≤ 41 Gy	40.7 (plan 1)/40.23 (plan 2)	39.42	38	39.73	38.13	38.36	39.21	40.36	38.48	39.82	39.81	40.65	40.47
Dmax (Gy)	<57 Gy	49.02 (plan 1)/50.94 (plan 2)	60.04	47.03	58.24	50.99	48.28	57.73	53.07	53.24	55.81	59.36	56.96	64.14
BOWEL
V41Gy (cc)	≤ 5 cc	0 (plan 1)/ 0 (plan 2)	0	0	0	0	0	0	0	0	0	0	0.01	0
D5cc (Gy)	≤ 41 Gy	25.56 (plan 1)/ 26.29 (plan 2)	24.5	24.63	27.16	23.62	21.95	21.21	27.07	23.02	26.33	22.25	30.97	28.83
Dmax (Gy)	<57 Gy	31.13 (plan 1)/35.86 (plan 2)	29.31	29.57	40.41	30.56	29.54	26.22	38.82	33.9	34.5	31.28	42.15	40.92
ESOPHAGUS
Dmax (Gy)	≤ 50.25 Gy	31.85 (plan 1)/37.39 (plan 2)	40.13	34.97	40.28	34.69	35.04	36.55	35.44	36.73	35.08	35.04	37.22	32.57
HEART
Dmax (Gy)	<57 Gy	25.05 (plan 1)/28.69 (plan 2)	21.65	24.44	32.61	33.02	29.17	32.85	29.17	32.85	29.37	29	28.57	28.92
GALLBLADDER
Dmax (Gy)	≤ 63 Gy	60(plan 1)/58.91 (plan 2)	72.1	71.33	69.25	59.93	66.51	62.09	73.33	59.02	57.13	57.86	58.22	52.02
SPINAL CORD
Dmax (Gy)	≤ 33.8	12.69 (plan 1 )/12.56 (plan 2)	14.67	14.83	13.83	14.06	13.63	14.42	11.43	13.17	11.8	12.93	12.75	14.48
KIDNEY RIGHT
D67.7% right kidney (Gy)	< 25.5 Gy	2.56 (plan 1)/2.83 (plan 2)	2.5	2.32	4.9	4.32	3.37	3.18	3.2	2.93	3.01	3.05	3.29	2.67
V25.5 Gy (%)	< 67.7 % right kidney	0 (plan 1)/ 0 (plan 2)	0	0	0	0	0	0	0	0	0	0	0	0
KIDNEY LEFT
D67.7% left kidney (Gy)	< 25.5 Gy	0.4 (plan 1)/ 0.81 (plan 2)	0.68	0.53	1.05	1.04	1.07	1	1.04	0.9	0.87	0.89	1.03	0.91
V25.5 Gy (%)	< 67.7 % left kidney	0 (plan 1)/ 0 (plan 2)	0	0	0	0	0	0	0	0	0	0	0	0
CENTRAL BILIARY TRACT
D0.05cc (Gy)	< 70 Gy	69.09 (plan 1)/ 68.75 (plan 2)	68.55	68.66	70.6	70.62	70.01	70.33	71.15	72.07	69.86	69.13	68.88	69
V70 Gy (cc)	< 0.05 cc	0 (plan 1)/ 0 (plan 2)	0.06	0.04	0.77	0.76	0.51	0.66	1.1	1.29	0.41	0.08	0.01	0.04
LIVER-GTV
dose in ≥ 700 mL healty liver (Gy)	<25.5 Gy	7.13 (plan 1)/ 6.28 (plan 2)	7.1	7.09	6.46	6.3	6.47	6.33	5.84	5.66	5.82	5.63	5.41	5.76
GTV
V45Gy (%)	--	97.23(plan 1)/ 92.84(plan 2)	97.24	95.9	92.47	90.42	93.61	92.98	97.19	92.07	95.92	91.8	96.37	91.44
V60Gy (%)	--	87.68(plan 1)/81.14 (plan 2)	90.39	86.53	80.9	77.08	82.48	81.18	89.25	79.45	86.11	79.17	87.03	77.79
D2% (Gy)	--	73.85(plan 1)/ 73.66(plan 2)	74.05	74.12	77.81	77.64	76.44	76.49	77.54	77.48	76.04	74.79	75.38	74.49
D50% (Gy)	--	70.42 (plan 1)/ 69.25(plan 2)	70.6	70.81	72.15	71.65	71.83	71.7	73.4	72.27	71.89	70.18	71.2	69.74
D98% (Gy)	--	43.49 (plan 1)/39.29 (plan 2)	43.14	41.29	39.8	39.3	39.65	39.82	43.29	39.73	41.41	39.41	42.04	39.21
PTV
V45Gy (%)	--	91.97 (plan 1)/88.37 (plan 2)	90.73	91.15	88.71	86.8	89.47	88.8	92.47	87.56	91.39	87.81	91.57	86.87
V60Gy (%)	--	78.94 (plan 1)/75.23 (plan 2)	73.85	77.33	75.44	73.23	76.51	75.83	79.39	74.41	78.56	74.45	77.09	71.91
D2% (Gy)	--	73.69(plan 1)/ 73.55(plan 2)	74.07	73.95	77.82	77.82	76.33	76.5	77.19	77.58	75.9	74.88	75.22	74.67
D50% (Gy)	--	68.53 (plan 1)/67.95 (plan 2)	68.24	68.63	70.28	70.17	69.69	69.74	70.54	70.45	69.64	68.85	69.02	68.38
D98% (Gy)	--	38.52 (plan 1)/38.54 (plan 2)	37.38	37.94	38.61	37.9	38.48	38.89	40.22	38	39.73	38.51	39.81	37.56
STOMACH VOLUME (cc)		265.17	202.71	177.59	191.65	234.96	191.58	281.37	178.55	157.87	178.46	181.11	144.47	168.32
GALLBLADDER VOLUME (cc)		95.54	128.06	134.07	139.3	143.7	135.34	135.2	105.95	109.57	69.76	98.26	65.02	64.45

## Sheet: patient 4
Patient 4
	constraint	treatment plan	pre-1	post-1	pre-2	post-2	pre-3	post-3	pre-4	post-4	pre-5	post-5	pre-6	post-6
STOMACH
V41Gy (cc)	≤ 5 cc	0.03	0	0	0	0	0	0	0.09	0.6	0	0.02	0.15	0.03
D5cc (Gy)	≤ 41 Gy	26.08	25.43	26.52	25.74	24.72	24.87	25.04	26.79	27.84	27.13	28.66	28.08	27.29
Dmax (Gy)	< 57 Gy	43.08	33.79	35.12	38.36	32.76	33.06	32.17	44.27	55.26	41.05	43.84	47.08	42.95
DUODENUM
V41Gy (cc)	≤ 5 cc	0.96	0.04	0.19	0.46	0	0.99	1.57	1.31	0.72	0.04	0.16	0.2	0.53
D5cc (Gy)	≤ 41 Gy	31.61	18.11	20.73	24.74	20.31	27.8	30.87	27.72	24.13	18.31	16.45	22.41	22.47
Dmax (Gy)	<57 Gy	49.9	43.9	47.1	47.84	42.41	47.68	51.7	52.21	47.07	42.7	46.39	43.53	51.32
BOWEL
V41Gy (cc)	≤ 5 cc	0	0	0	0	0	0	0	0	0	0	0	0	0
D5cc (Gy)	≤ 41 Gy	18.14	12.15	15.75	10.91	18.5	20.71	18.48	19.64	20.64	21.22	21.57	20.71	19.58
Dmax (Gy)	<57 Gy	27.39	23.62	26.69	20.25	27	27.15	26.65	27.04	27.13	27.4	27.29	27.08	26.73
ESOPHAGUS
Dmax (Gy)	≤ 50.25 Gy	22.74	27.13	27.15	23.15	23.21	21.95	24.59	23.89	26.15	22.11	21.56	21.52	23.67
HEART
Dmax (Gy)	<57 Gy	25.98	24.41	24.49	25.48	26.55	25.85	27.98	28.4	29.29	24.53	24.66	24.9	25.31
GALLBLADDER
Dmax (Gy)	≤ 63 Gy	61.93	65.33	63.24	68.01	67.27	65.96	69.09	68.99	68.04	67.53	67.9	67	66.05
SPINAL CORD
Dmax (Gy)	≤ 33.8	25.03	24.95	21.88	24.97	24.92	25.77	22.86	27.75	26.59	25.82	25.2	26.17	25.51
KIDNEY RIGHT
D67.7% right kidney (Gy)	< 25.5 Gy	7.3	7.65	6.18	7.76	6.05	8.47	6.94	7.05	6.28	7.31	6.53	7.43	6.51
V25.5 Gy (%)	< 67.7 % right kidney	27.95	28.86	22.02	26.99	21.86	30.58	25.29	28.51	23.53	27.9	24.41	29.43	24.43
KIDNEY LEFT
D67.7% left kidney (Gy)	< 25.5 Gy	2.51	2.72	2.45	2.91	2.61	2.65	2.35	2.82	2.61	2.9	2.71	2.67	2.48
V25.5 Gy (%)	< 67.7 % left kidney	0	0	0	0	0	0	0	0	0	0	0	0	0
CENTRAL BILIARY TRACT
D0.5cc (Gy)	< 70 Gy	68.66	69.9	69.52	72.08	71.78	73.12	74.72	76.86	75.69	70.49	71.26	71.93	72.74
V70 Gy (cc)	< 0.5 cc	0.01	0.47	0.39	1.21	0.77	1.01	1	1.51	1.45	0.8	1.92	1.11	1.03
LIVER-GTV
dose in ≥ 700 mL healty liver (Gy)	<25.5 Gy	25.2	22.39	22.67	20.55	20.32	21.85	22.62	23.14	23.25	21.78	21.87	21.55	22.01
GTV
V45Gy (%)	--	99.39	99.73	99.46	99.95	99.42	99.69	99.74	99.53	99.65	99.79	99.73	99.64	99.56
V60Gy (%)	--	95.11	96.68	95.17	97.72	95.62	97.12	96.81	96.14	96.44	96.8	96.7	96.75	96.37
D2% (Gy)	--	71.93	73.84	73.28	75.49	75.25	76.22	76.85	79.01	80.07	74.89	75.2	75.21	75.58
D50% (Gy)	--	67.17	68.83	68.34	70.32	69.78	70.53	70.64	71.81	72.11	69.73	69.96	69.9	70
D98% (Gy)	--	53.37	56.86	53.65	59.53	53.99	57.19	56.29	53.97	54.68	57.25	56.88	56.95	55
PTV
V45Gy (%)	--	97.65	98.25	98.01	98.84	98.04	98.47	98.57	98.06	98.41	98.41	98.43	98.27	98.26
V60Gy (%)	--	87.71	89.34	87.43	90.37	88.83	91.38	91.23	91.07	91	89.98	90.04	90.45	89.84
D2% (Gy)	--	70.79	72.4	71.96	74.09	73.9	75.05	76.07	78.63	79.92	73.48	73.75	73.76	74.2
D50% (Gy)	--	65.59	67.19	66.96	68.37	67.97	68.82	69.12	70.29	70.76	68	68.2	68.14	68.32
D98% (Gy)	--	43.76	45.96	45.02	48.2	45.13	57.19	47.14	45.22	46.42	46.58	46.68	46.03	45.93
STOMACH VOLUME (cc)		252.47	255.83	286.88	208.86	163.13	190.38	247.81	221.47	148.08	202.11	180.29	168.95	229.56
GALLBLADDER VOLUME (cc)		54.23	62.32	60.95	64.14	62.73	57.74	60.94	60.29	64.03	63.23	63.34	63.35	65.74

## Sheet: patient 5
Patient 5
	constraint	treatment plan (plan 2 from fraction 3)	pre-1	post-1	pre-2	post-2	pre-3	post-3	pre-4	post-4	pre-5	post-5	pre-6	post-6
STOMACH
V41Gy (cc)	≤ 5 cc	1.31(plan 1)/1.14 (plan 2)	0.24	0.23	0.63	0.49	0.91	0.88	1.55	0.15	0.73	0.22	0	0.43
D5cc (Gy)	≤ 41 Gy	21.04(plan 1)/18.31 (plan 2)	17.63	16.68	16.41	15.25	19.02	16.96	19.82	16.42	19.15	16.06	16.34	16.77
Dmax (Gy)	< 57 Gy	57.09(plan 1)/53.42 (plan 2)	49.68	48.99	53.12	52.62	55.6	56.95	61.41	49.07	53.24	52.1	23.29	51.32
DUODENUM
V41Gy (cc)	≤ 5 cc	0.73(plan 1)/2.87 (plan 2)	0.04	0.15	0.52	0.21	0.97	1.09	0.85	1.35	0.38	1.68	1.3	0.76
D5cc (Gy)	≤ 41 Gy	24.05(plan 1)/28.37 (plan 2)	15.52	12.3	13.31	10.8	18.21	16.9	14.31	19.48	8.95	22.96	21.9	10.82
Dmax (Gy)	<57 Gy	51.49(plan 1)/ 57.69 (plan 2)	45.09	51.59	51.84	48.21	55.98	53.9	57.47	53.48	50.22	59.33	51.57	60.58
BOWEL
V41Gy (cc)	≤ 5 cc	0(plan 1)/ 0(plan 2)	0	0	0	0	0	0	0	0	0	0	0	0
D5cc (Gy)	≤ 41 Gy	10.4(plan 1)/15 (plan 2)	10.01	9.81	14.78	13.97	5.74	13.38	12.13	14.36	11.9	13.38	5.23	13.77
Dmax (Gy)	<57 Gy	14.61(plan 1)/ 19.75(plan 2)	13.05	12.71	19.14	18.67	15.22	18.63	18.96	19.2	18.65	18.13	9.37	19.04
ESOPHAGUS
Dmax (Gy)	≤ 50.25 Gy	11.73 (plan 1)/12.98 (plan 2)	15.28	10.43	12.08	12.91	16.35	13.04	18.74	12.95	13.45	12.65	15.12	13
HEART
Dmax (Gy)	<57 Gy	9.43(plan 1)/ 13.53(plan 2)	12.01	11.9	13.16	14.33	15.52	13.69	14.97	14.7	12.78	13.41	15.7	15.84
GALLBLADDER
Dmax (Gy)	≤ 63 Gy	43.05(plan 1)/ 50.05(plan 2)	40.66	39.24	47.54	48.79	16.29	49.96	57.16	34.04	45.56	19.31	49.44	66.4
SPINAL CORD
Dmax (Gy)	≤ 33.8	5.48(plan 1)/8.65 (plan 2)	5.04	4.78	9.38	8.11	8.44	8.19	8.89	8.53	8.97	8.77	8.51	7.96
KIDNEY RIGHT
D67.7% right kidney (Gy)	< 25.5 Gy	1.51(plan 1)/0.93 (plan 2)	1.17	1.79	0.88	0.83	1.22	0.66	0.45	0.52	0.44	0.48	1.28	0.95
V25.5 Gy (%)	< 67.7 % right kidney	0(plan 1)/ 0(plan 2)	0	0	0	0	0	0	0	0	0	0	0	0
KIDNEY LEFT
D67.7% left kidney (Gy)	< 25.5 Gy	1.68(plan 1)/2.06 (plan 2)	1.78	1.65	2.19	2.08	2.17	2.1	2.09	2.16	2.2	2.14	2.2	2.15
V25.5 Gy (%)	< 67.7 % left kidney	0(plan 1)/ 0(plan 2)	0	0	0	0	0	0	0	0	0	0	0	0
CENTRAL BILIARY TRACT
D0.5cc (Gy)	< 70 Gy	64.36(plan 1)/ 64.4(plan 2)	59.95	56.94	56.99	60.12	63.64	66.56	62.39	60.13	59.59	59.05	63.77	66.67
V70 Gy (cc)	< 0.5 cc	0(plan 1)/ 0.04(plan 2)	0	0	0	0	0	0.12	0	0	0	0	0.01	0.05
LIVER-GTV
dose in ≥ 700 mL healty liver (Gy)	<25.5 Gy	6.98(plan 1)/4.64 (plan 2)	7.05	7	6.54	7.42	6.32	6.04	6.19	5.94	5.1	5.28	7.03	6.62
GTV
V45Gy (%)	--	100 (plan 1)/ 100 (plan 2)	99.82	99.83	100	100	100	100	100	100	100	100	99.95	99.92
V60Gy (%)	--	97.98 (plan 1)/98.71 (plan 2)	96.9	96.78	99.15	96.82	97.52	97.74	99.3	97.29	99.09	98.94	90.49	91.03
D2% (Gy)	--	73.33 (plan 1)/ 74.4(plan 2)	74.16	74.41	75.34	75.28	75.94	75.17	75.55	75.09	75.44	74.75	73.47	74.19
D50% (Gy)	--	66.62(plan 1)/ 68.76(plan 2)	67.46	67.72	69.33	69.38	69.97	69.3	69.78	69.29	69.51	68.93	66.77	67.19
D98% (Gy)	--	59.92(plan 1)/62.2 (plan 2)	56.88	56.97	63.08	57.62	58.69	59.18	63.75	58.19	63.08	62.82	51.52	51.93
PTV
V45Gy (%)	--	97.9(plan 1)/99.54 (plan 2)	97.67	97.77	99.75	98.55	99.05	99.22	99.86	98.84	99.8	99.72	93.66	94.02
V60Gy (%)	--	91.34(plan 1)/ 89.68(plan 2)	90.55	90.29	86.59	84.89	87.25	86.81	91.14	87.29	89	89.63	71.64	71.99
D2% (Gy)	--	72.18(plan 1)/ 73.87(plan 2)	72.95	73.21	74.77	74.71	75.32	74.59	74.97	74.54	74.86	74.18	72.9	73.58
D50% (Gy)	--	64.59(plan 1)/65.03 (plan 2)	65.66	65.66	65.97	65.77	66.72	65.86	66.49	65.79	66.25	65.39	64.45	64.17
D98% (Gy)	--	44.47(plan 1)/ 49.98(plan 2)	43.68	44.16	51.07	46.41	48.03	48.72	52.29	47.42	51.88	51.13	35.79	36.8
STOMACH VOLUME (cc)		299.14	321.1	206.1	237.72	203.01	666.09	331.41	481.22	258.39	414.73	199.08	849.35	519.62
GALLBLADDER VOLUME (cc)		7.62	23.83	27.8	7.72	7.83	4.08	13.63	9.79	15.28	11.58	9	61.29	79.86

## Sheet: patient 6
Patient 6
	constraint	treatment plan	pre-1	post-1	pre-2	post-2	pre-3	post-3	pre-4	post-4	pre-5	post-5	pre-6	post-6
STOMACH
V41Gy (cc)	≤ 5 cc	1.29	5.14	1.56	8.21	8.33	5.91	7.07	7.76	3.04	5.83	6.13	7.58	8.9
D5cc (Gy)	≤ 41 Gy	33.19	41.56	27.49	47.31	47.95	43.4	45.95	46.45	34.94	42.97	44.23	46.18	52.27
Dmax (Gy)	< 57 Gy	57.28	75.73	73.44	71.95	72.09	68.63	70.81	71.19	68.41	73.91	72.57	69.67	75.71
DUODENUM
V41Gy (cc)	≤ 5 cc	4.52	2.72	6.91	6.24	8.38	9.49	3.83	6.55	6.84	9.29	9.35	12.1	8.26
D5cc (Gy)	≤ 41 Gy	40.01	21.76	49.26	44.09	50.63	51.49	37.22	45.01	46.89	50.47	50.69	58.67	51.18
Dmax (Gy)	<57 Gy	57.91	74.26	75.12	63.83	70.02	70.83	62.89	68.5	67.34	69.85	70.53	71.26	71.61
BOWEL
V41Gy (cc)	≤ 5 cc	0	0	0	0	0	0	0	0	0	0	0	0	0
D5cc (Gy)	≤ 41 Gy	8.11	19.25	17.96	16.04	12.96	11.31	10.23	11.88	11.78	11.25	8.83	6.19	5.21
Dmax (Gy)	<57 Gy	22.36	26.05	25.92	34.52	23.91	18.38	17.12	18.26	18.08	19.78	30.43	10.81	14.02
ESOPHAGUS
Dmax (Gy)	≤ 50.25 Gy	12.41	9.58	9.02	11.2	9.85	12.95	9.61	10.02	9.82	9.56	10.23	8.92	9.09
HEART
Dmax (Gy)	<57 Gy	7.46	6.95	6.65	10.32	9.53	7.6	10.3	9.88	9.53	6.23	10.79	10.04	9.33
GALLBLADDER
Dmax (Gy)	≤ 63 Gy	63.15	71.64	67.13	63.73	69.64	69.41	69.42	67.47	68.54	70.1	64.51	65.4	65.8
SPINAL CORD
Dmax (Gy)	≤ 33.8	17.15	14	13.42	15.75	15.27	16.25	14.75	15.48	15.01	16.43	15.23	16.3	14.2
KIDNEY RIGHT
D67.7% right kidney (Gy)	< 25.5 Gy	3.47	2.98	2.85	3.2	2.8	3.68	2.73	2.99	2.34	3.14	2.61	3.08	2.66
V25.5 Gy (%)	< 67.7 % right kidney	1.68	0.4	0.05	0.73	0.49	1.68	0.39	0.82	0.49	0.48	1.17	1.77	0.38
KIDNEY LEFT
D67.7% left kidney (Gy)	< 25.5 Gy	4.05	3.69	3.73	3.89	3.48	3.18	3.37	3.45	3.38	3.93	3.29	3.38	2.97
V25.5 Gy (%)	< 67.7 % left kidney	0	0	0	0	0	0	0	0	0	0	0	0	0
CENTRAL BILIARY TRACT
D0.5cc (Gy)	< 70 Gy	69.73	73.47	75.29	71.26	71.74	71.02	71.66	71.72	72	72.34	72.28	72.11	72.54
V70 Gy (cc)	< 0.5 cc	0.29	4.46	2.84	1.43	1.94	1.35	1.75	1.99	2.29	2.86	2.09	3.14	2.65
LIVER-GTV
dose in ≥ 700 mL healty liver (Gy)	<25.5 Gy	11.46	7.18	8.41	8.98	8.8	8.28	10.61	8.35	8	8.59	9.82	9.19	8.6
GTV
V45Gy (%)	--	100	100	99.98	100	100	100	98.46	100	100	100	100	100	99.98
V60Gy (%)	--	92.62	99.29	96.54	97.74	99.88	98.73	89.18	99.24	97.43	99.13	96.19	99.99	97.32
D2% (Gy)	--	70.43	75.19	73.38	71.64	72.34	71.6	72.02	72.44	72.88	72.84	72.77	72.72	73.27
D50% (Gy)	--	65.33	69.3	68.16	66.83	67.7	66.81	66.56	67.39	67.48	68.05	67.43	68.06	67.99
D98% (Gy)	--	55.09	62.47	58.07	59.75	63.06	60.9	46.91	61.52	59.29	61.56	58.07	63.83	58.86
PTV
V45Gy (%)	--	96.13	90.95	87.86	96.31	98.01	96.37	83.02	94.24	89.04	98.42	89.12	99.09	89.16
V60Gy (%)	--	83.78	74.49	70.54	78.69	80.92	78.39	65.49	75.98	70.91	82.59	71.29	84.03	71.92
D2% (Gy)	--	71.98	74.51	73.75	72.88	73.63	72.75	72.08	73.11	72.81	74.03	72.92	73.96	73.48
D50% (Gy)	--	64.47	66.71	65.76	65.38	66.13	65.27	64.38	65.61	65.37	66.6	65.45	66.63	65.89
D98% (Gy)	--	41.51	31.33	28.25	42.19	45.02	41.28	17.6	38	27.37	45.78	27.08	48.85	30.38
STOMACH VOLUME (cc)		406.06	338.45	256.8	390.92	271.78	268	213.89	388.31	304.13	343.39	313.49	277.81	228.83
GALLBLADDER VOLUME (cc)		53.81	44.67	62.48	62.45	61.74	59.26	67.85	64.21	61.85	55.17	54.61	45.26	51.72
